# Supplementary material for: Chilean Observation Network De MeteOr Radars (CONDOR): Multi-Static System Configuration & Wind Comparison with Co-located Lidar
Source: Copernicus journal article supplement (doi:10.5194/amt-2024-126), 2024-09-18
Supplement: Supplementary file [file amt-2024-126-RC1-supplement.pdf]

This manuscript introduces an interesting multi-static meteor radar system, Chilean Observation Network De MeteOr Radars (CONDOR), and its wind comparison with co-located lidar. The initial observation results demonstrate that this new CONDOR system has excellent meteor detecting capability, therefore obtains higher time resolution (such as 15 min) and precise winds comparing with co-located lidar. Interesting 3D wind fields and horizontal wavelength spectra during Hunga Tonga–Hunga Ha’apai (HTHH) volcanic eruption are also exhibited and exceptional 220 m/s wind speed are recorded at the same time. This manuscript is worth publishing, but I still have some comments.

1. Line 75: the seeing values range of LCO site could be introduced in section 3.2 when the authors describe the ALO lidar system. Seeing value seems more related with optical observations and can explain how the lidar obtains such high-quality wind data that are used to compare with CONDOR.
2. I wonder why the authors give the discontinuous polar diagrams in Figure 2 (a)? Complete polar diagrams might give more information and better explanation of the meteor distribution.
3. Line 278: the authors describe the GW momentum fluxes algorithm developed for multi-static meteor radar system but no results are followed. I guess it’s the author’s future work and can be briefly introduced in last section?
4. Section 4.2: I recommend the authors remove this section.
